# Supplementary material for: Effects of CO2 on the deactivation behaviors of Co/Al2O3 and Co/SiO2 in CO hydrogenation to hydrocarbons
Source: Royal Society of Chemistry journal article supplement (doi:10.1039/c7cy01065f), 2017-01-01
Supplement: c7cy01065f1.pdf [file c7cy01065f1.pdf]

## Supplementary material

### Effects of CO<sub>2</sub> to deactivation behaviors of Co/Al<sub>2</sub>O<sub>3</sub> and Co/SiO<sub>2</sub> for CO hydrogenation to hydrocarbons

Kyung Soo Park, K. Saravanan, Seon-Ju Park, Yun-Jo Lee, Ki-Won Jeon, Jong Wook

Bae\*

**Figure S1.** Pore size distribution of the fresh Co/ $\gamma$ -Al<sub>2</sub>O<sub>3</sub> and Co/SiO<sub>2</sub> catalysts

**Figure S2.** PXRD patterns of the fresh Co/ $\gamma$ -Al<sub>2</sub>O<sub>3</sub> [from **ref. 8**] and Co/SiO<sub>2</sub> catalysts

**Figure S3.** H<sub>2</sub>-TPR profiles of the fresh Co/ $\gamma$ -Al<sub>2</sub>O<sub>3</sub> and Co/SiO<sub>2</sub> catalysts at a heating rate of 5 °C/min from 100 to 1100 °C

**Figure S4.** XPS analysis of (A) Al 2p of the Co/ $\gamma$ -Al<sub>2</sub>O<sub>3</sub> and (B) Si 2p of the Co/SiO<sub>2</sub> on the fresh (only reduction), used catalysts after FTS reaction without CO<sub>2</sub> addition and used catalysts after FTS reaction with 20%CO<sub>2</sub> addition

**Figure S5.** Schemes of FT-IR analyses for the successive adsorption of CO  $\rightarrow$  CO<sub>2</sub>  $\rightarrow$  CO on the reduced CoAl and CoSi after H<sub>2</sub> purge at each step to verify the oxidation-reduction properties of the supported cobalt nanoparticles

**Figure S6.** FT-IR analysis of adsorbed CO molecules on the (A) Co/ $\gamma$ -Al<sub>2</sub>O<sub>3</sub> catalyst and (B) Co/SiO<sub>2</sub> catalyst for the fresh catalyst, used catalyst without CO<sub>2</sub> addition and used catalyst with CO<sub>2</sub> addition

**Figure S7.** CO conversion and product distribution with time one stream on the (A) Co/ $\gamma$ -Al<sub>2</sub>O<sub>3</sub> without CO<sub>2</sub> addition, (B) Co/ $\gamma$ -Al<sub>2</sub>O<sub>3</sub> with 20vol%CO<sub>2</sub> addition, (C) Co/SiO<sub>2</sub> without CO<sub>2</sub> addition and (D) Co/SiO<sub>2</sub> with 20vol%CO<sub>2</sub> addition

**Figure S8.** Cobalt particle size distributions from the TEM images of (A) Co/ $\gamma$ -Al<sub>2</sub>O<sub>3</sub>, (B) Co/SiO<sub>2</sub>: (1) reduced catalyst, (2) used catalyst without CO<sub>2</sub> addition and (3) used catalyst with CO<sub>2</sub> addition

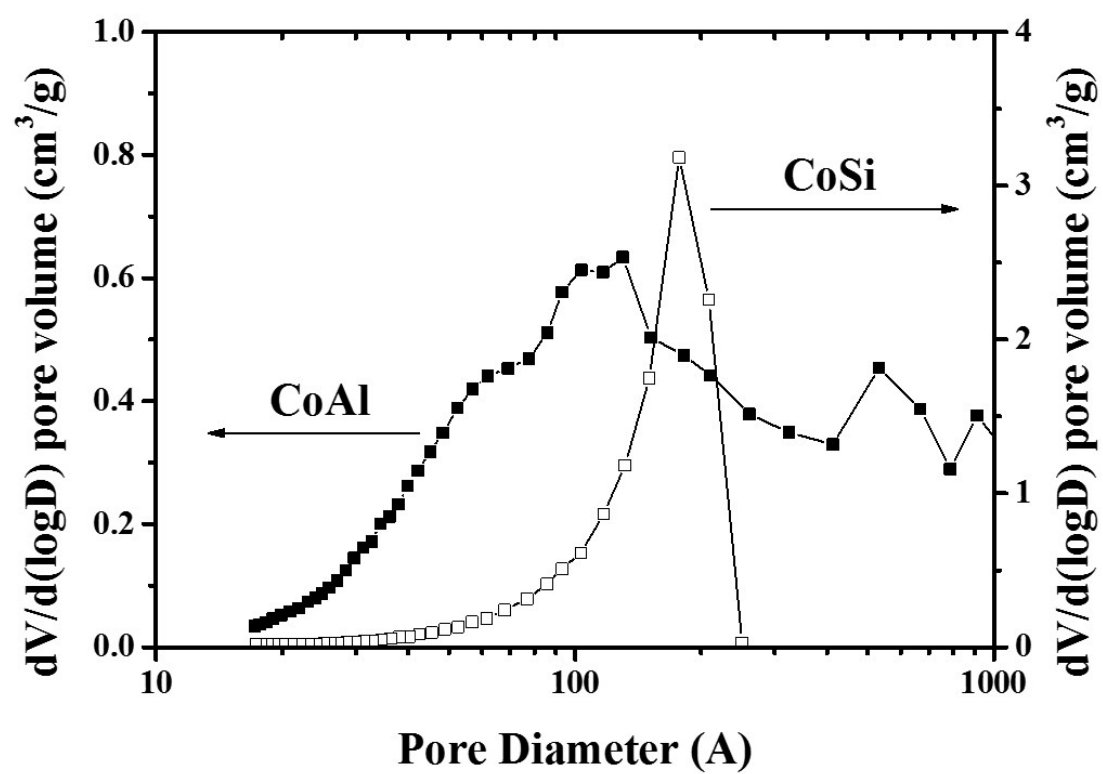

**Figure S1.** Pore size distribution of the fresh Co/ $\gamma$ -Al<sub>2</sub>O<sub>3</sub> and Co/SiO<sub>2</sub> catalysts

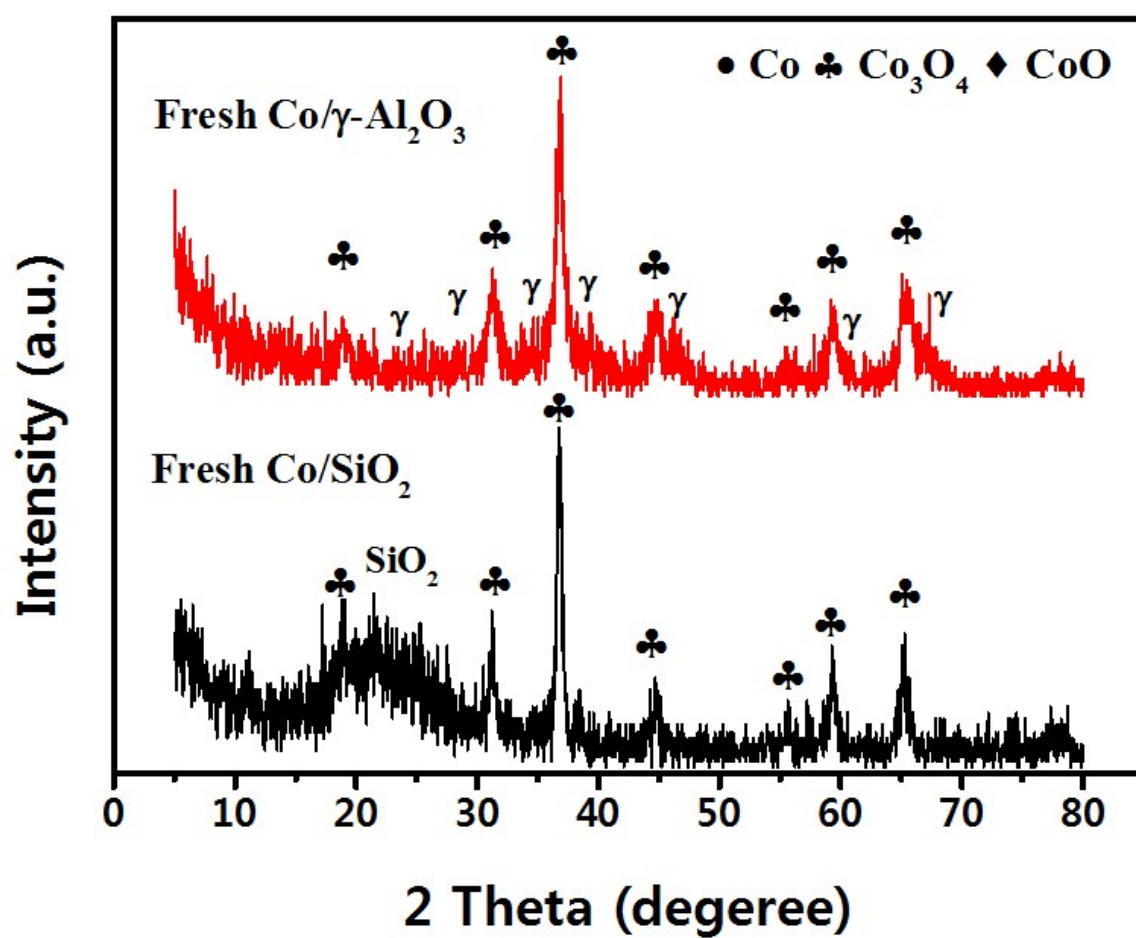

**Figure S2.** PXRD patterns of the fresh Co/ $\gamma\text{-Al}_2\text{O}_3$  [from ref. 8] and Co/ $\text{SiO}_2$  catalysts

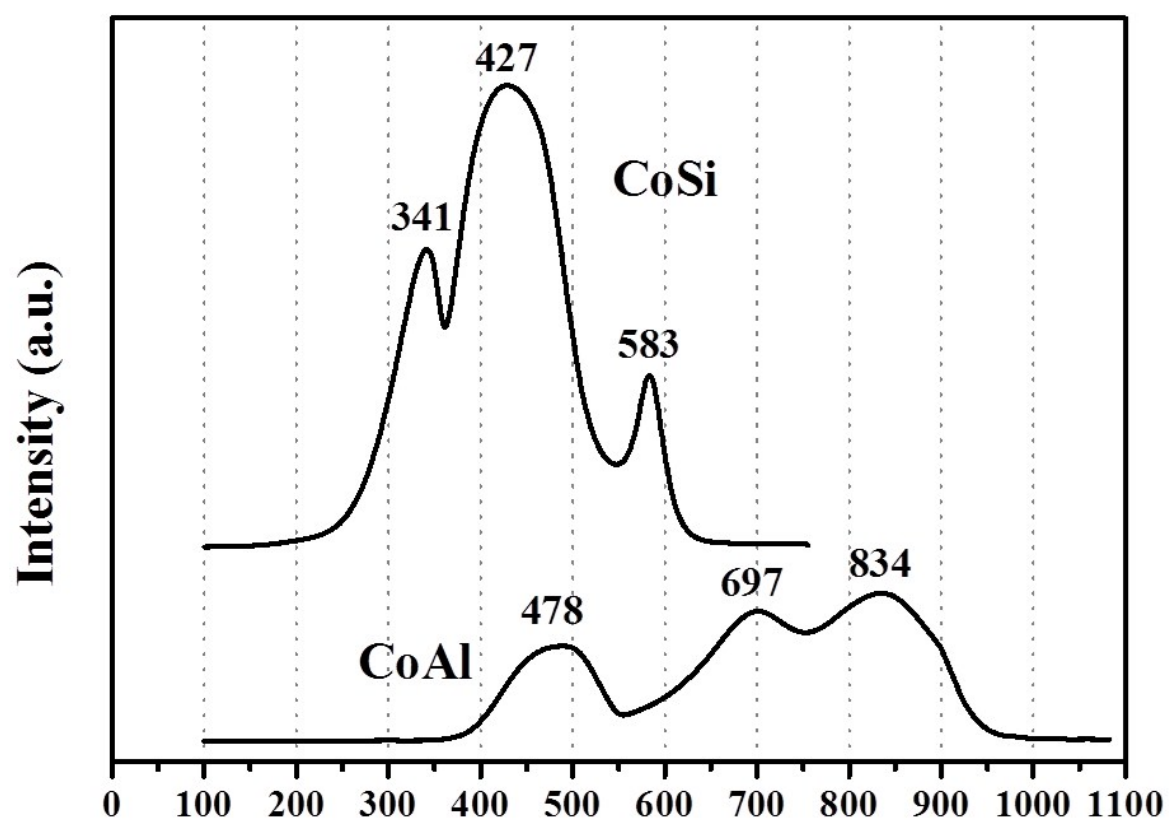

**Figure S3.** H<sub>2</sub>-TPR profiles of the fresh Co/ $\gamma$ -Al<sub>2</sub>O<sub>3</sub> and Co/SiO<sub>2</sub> catalysts at a heating rate of 5 °C/min from 100 to 1100 °C

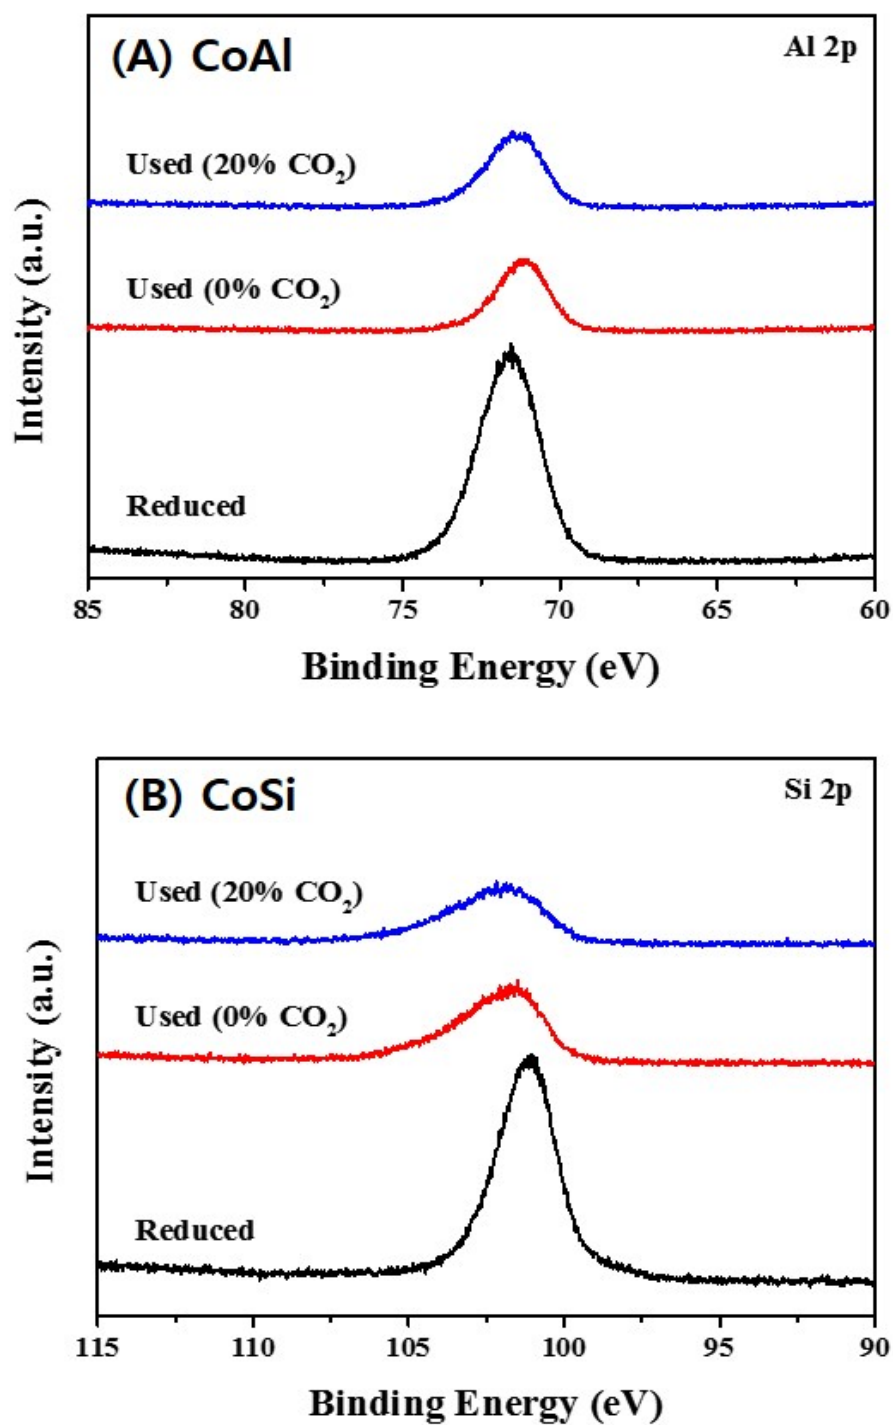

**Figure S4.** XPS analysis of (A) Al 2p of the Co/ $\gamma$ -Al<sub>2</sub>O<sub>3</sub> and (B) Si 2p of the Co/SiO<sub>2</sub> on the fresh (only reduction), used catalysts after FTS reaction without CO<sub>2</sub> addition and used catalysts after FTS reaction with 20%CO<sub>2</sub> addition

*In-situ* FT-IR analysis schemes on the CoAl and CoSi

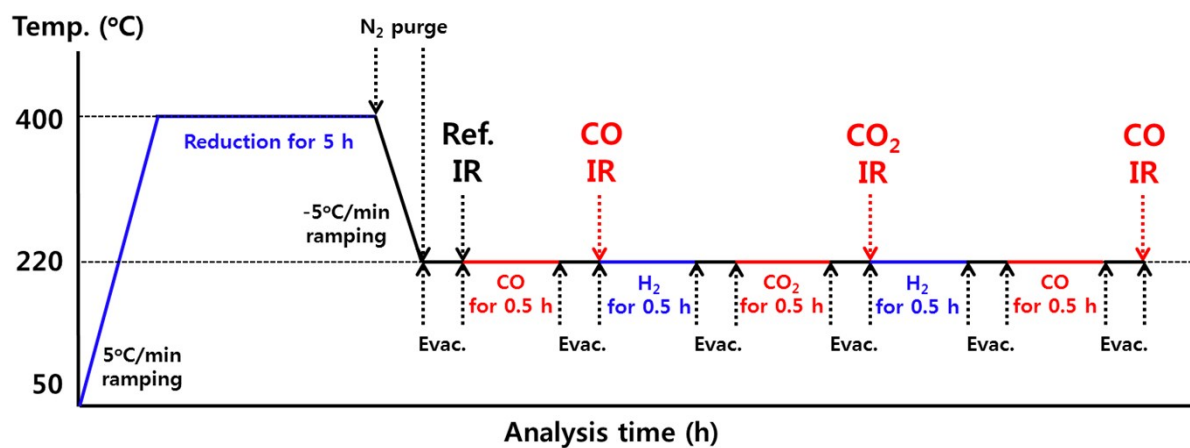

**Figure S5.** Schemes of FT-IR analyses for the successive adsorption of CO → CO<sub>2</sub> → CO on the reduced CoAl and CoSi after H<sub>2</sub> purge at each step to verify the oxidation-reduction properties of the supported cobalt nanoparticles

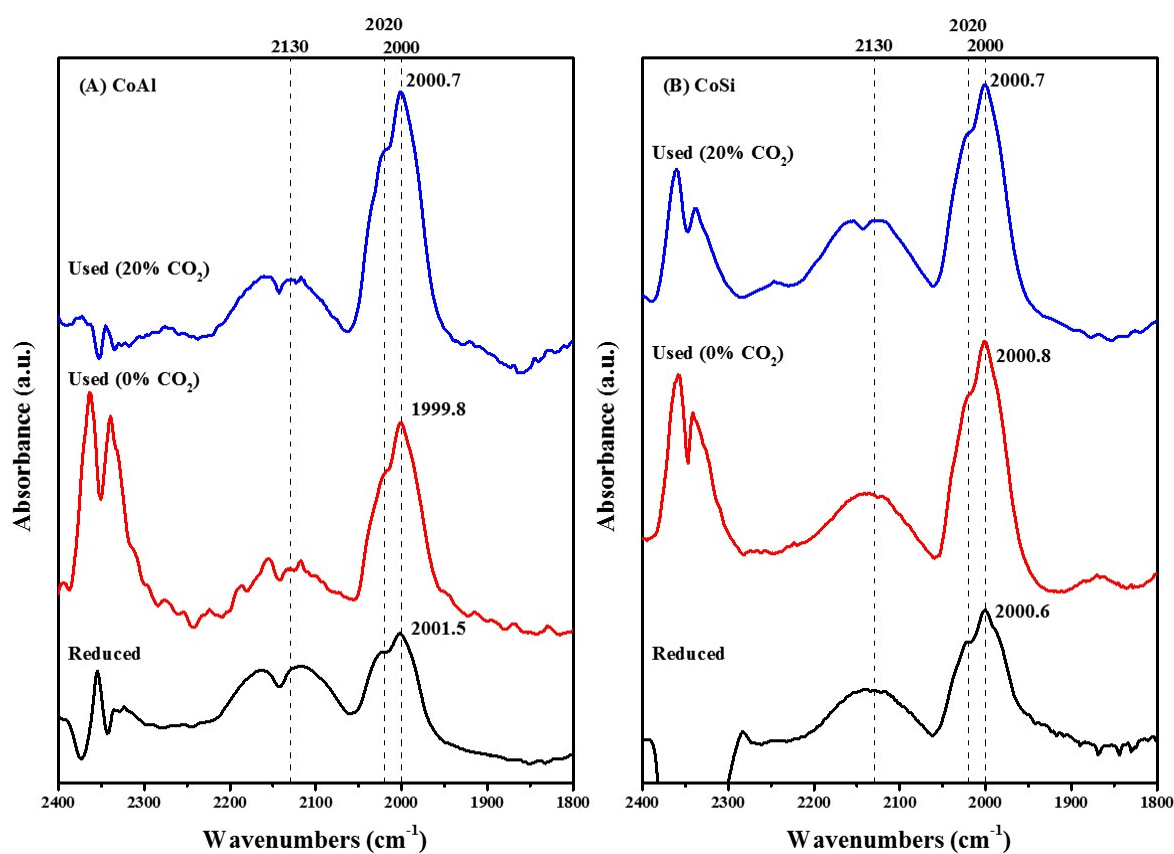

**Figure S6.** FT-IR analysis of adsorbed CO molecules on the (A) Co/ $\gamma$ -Al<sub>2</sub>O<sub>3</sub> catalyst and (B) Co/SiO<sub>2</sub> catalyst for the fresh catalyst, used catalyst without CO<sub>2</sub> addition and used catalyst with CO<sub>2</sub> addition



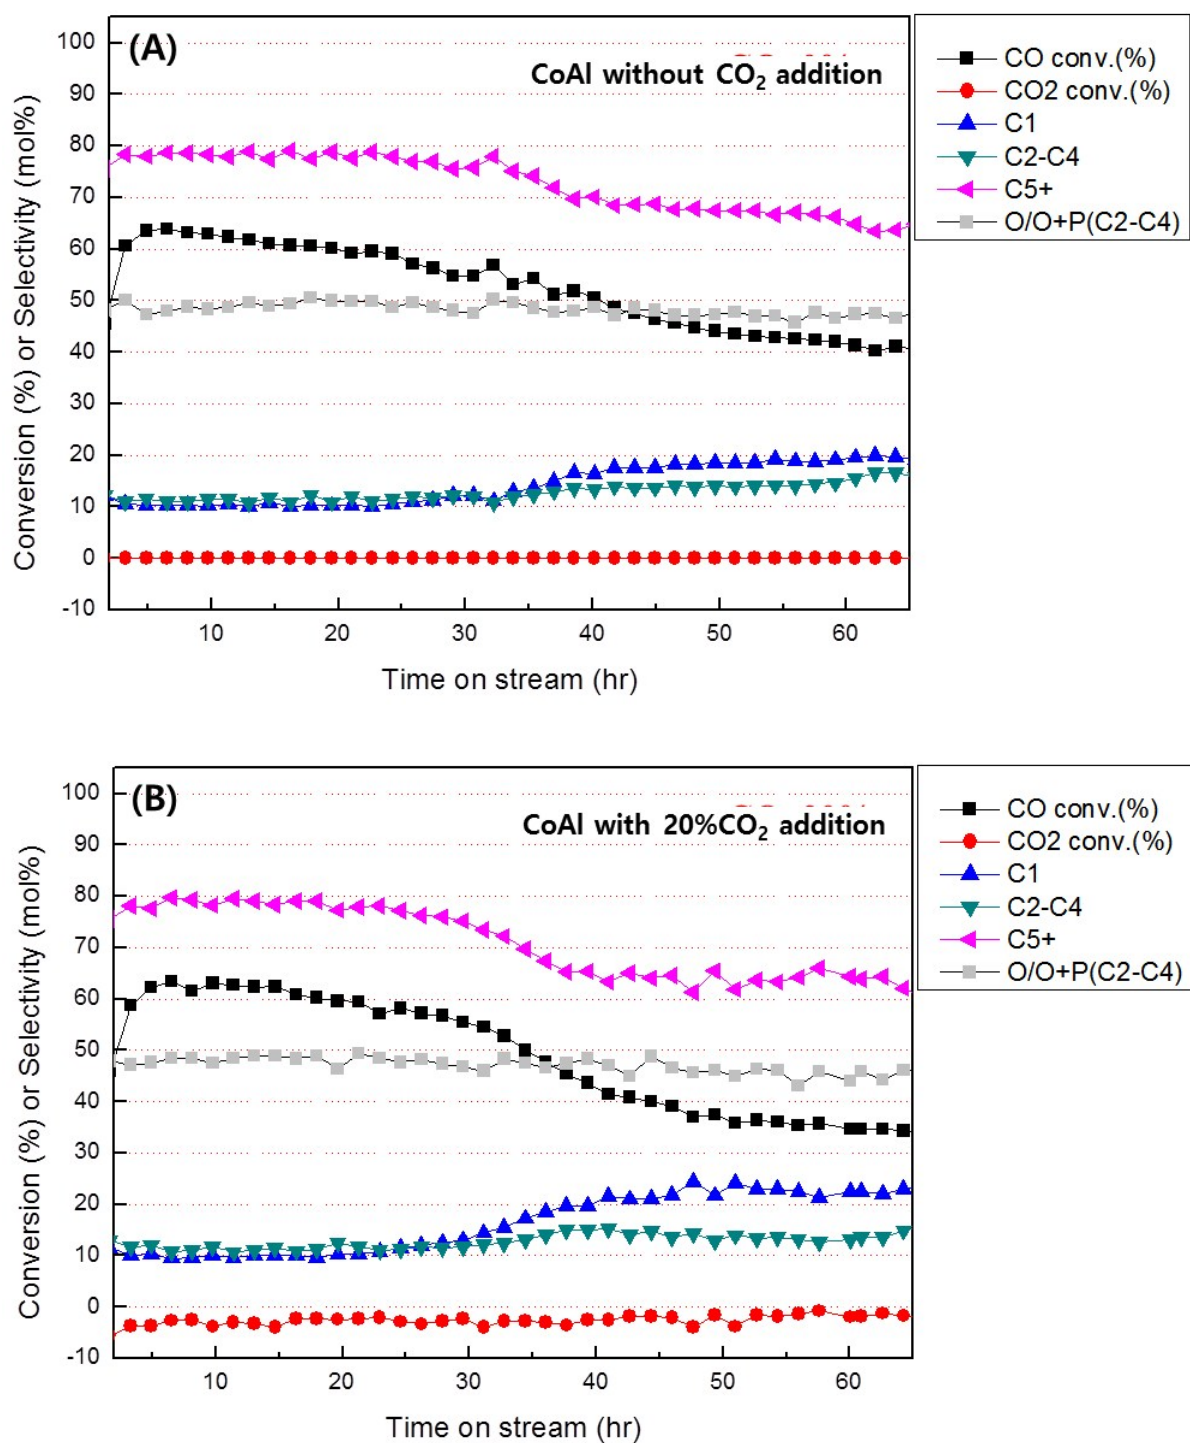

**Figure S7.** CO conversion and product distribution with time on stream on the (A) Co/ $\gamma$ -Al<sub>2</sub>O<sub>3</sub> without CO<sub>2</sub> addition, (B) Co/ $\gamma$ -Al<sub>2</sub>O<sub>3</sub> with 20vol%CO<sub>2</sub> addition, (C) Co/SiO<sub>2</sub> without CO<sub>2</sub> addition and (D) Co/SiO<sub>2</sub> with 20vol%CO<sub>2</sub> addition

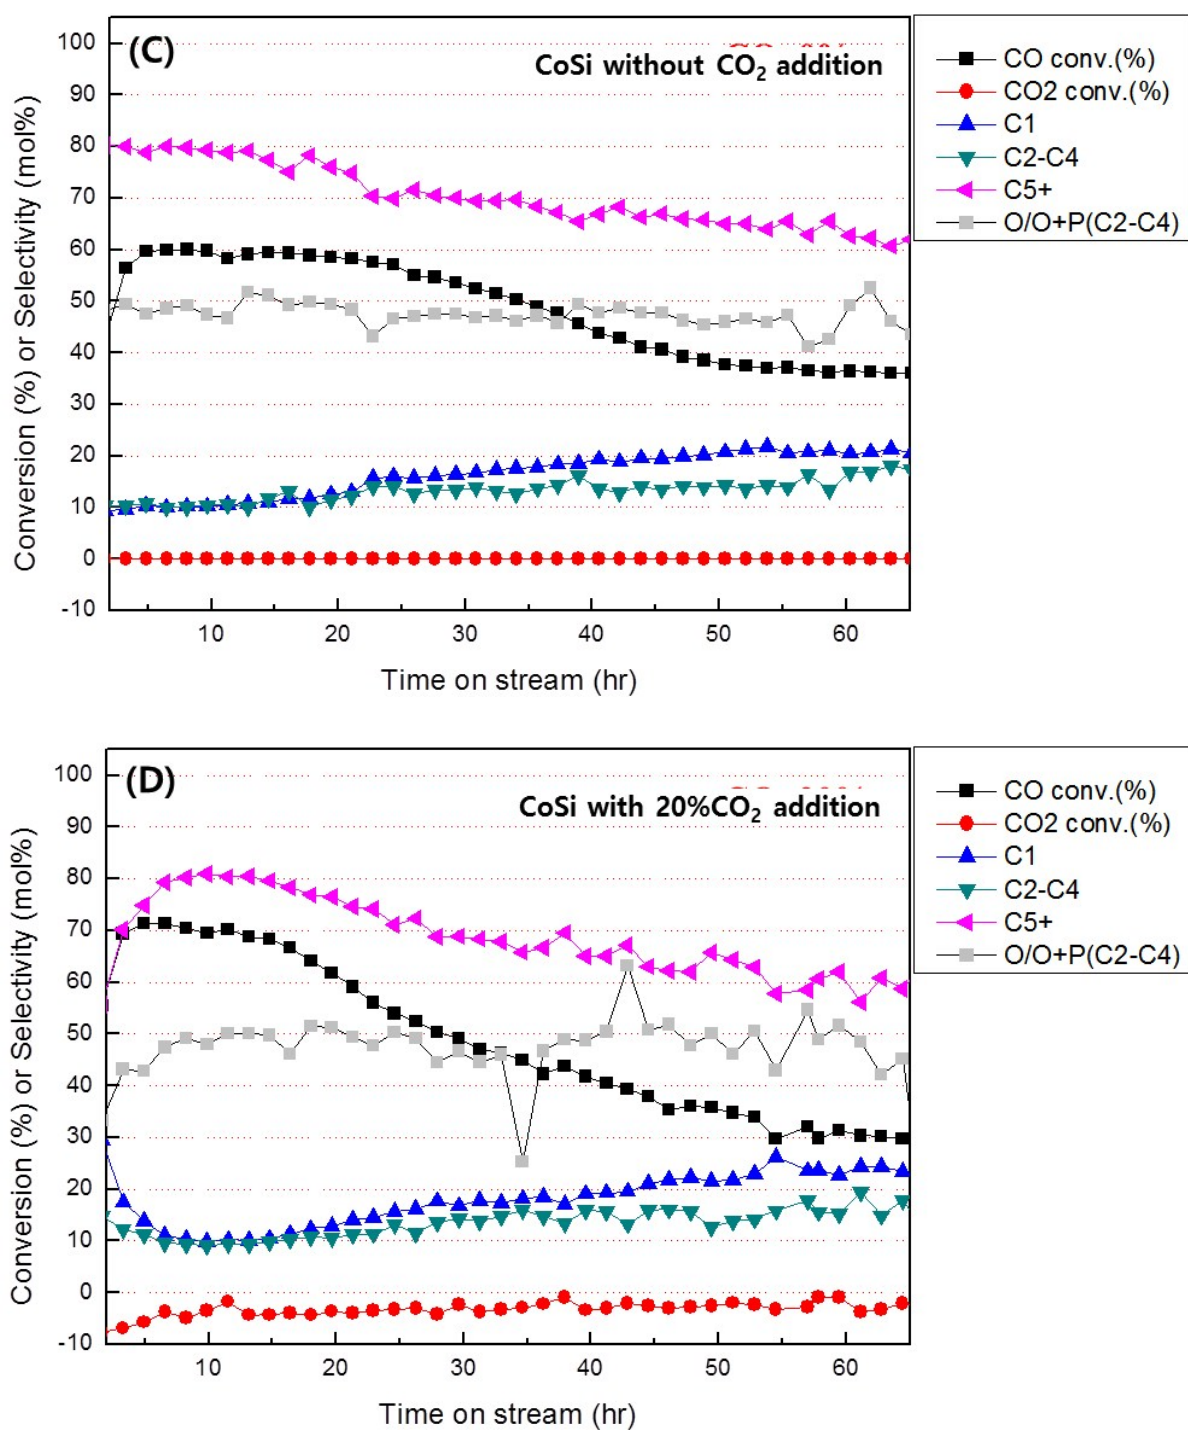

**Figure S7.** CO conversion and product distribution with time on stream on the (A) Co/ $\gamma$ -Al<sub>2</sub>O<sub>3</sub> without CO<sub>2</sub> addition, (B) Co/ $\gamma$ -Al<sub>2</sub>O<sub>3</sub> with 20vol%CO<sub>2</sub> addition, (C) Co/SiO<sub>2</sub> without CO<sub>2</sub> addition and (D) Co/SiO<sub>2</sub> with 20vol%CO<sub>2</sub> addition (continued)

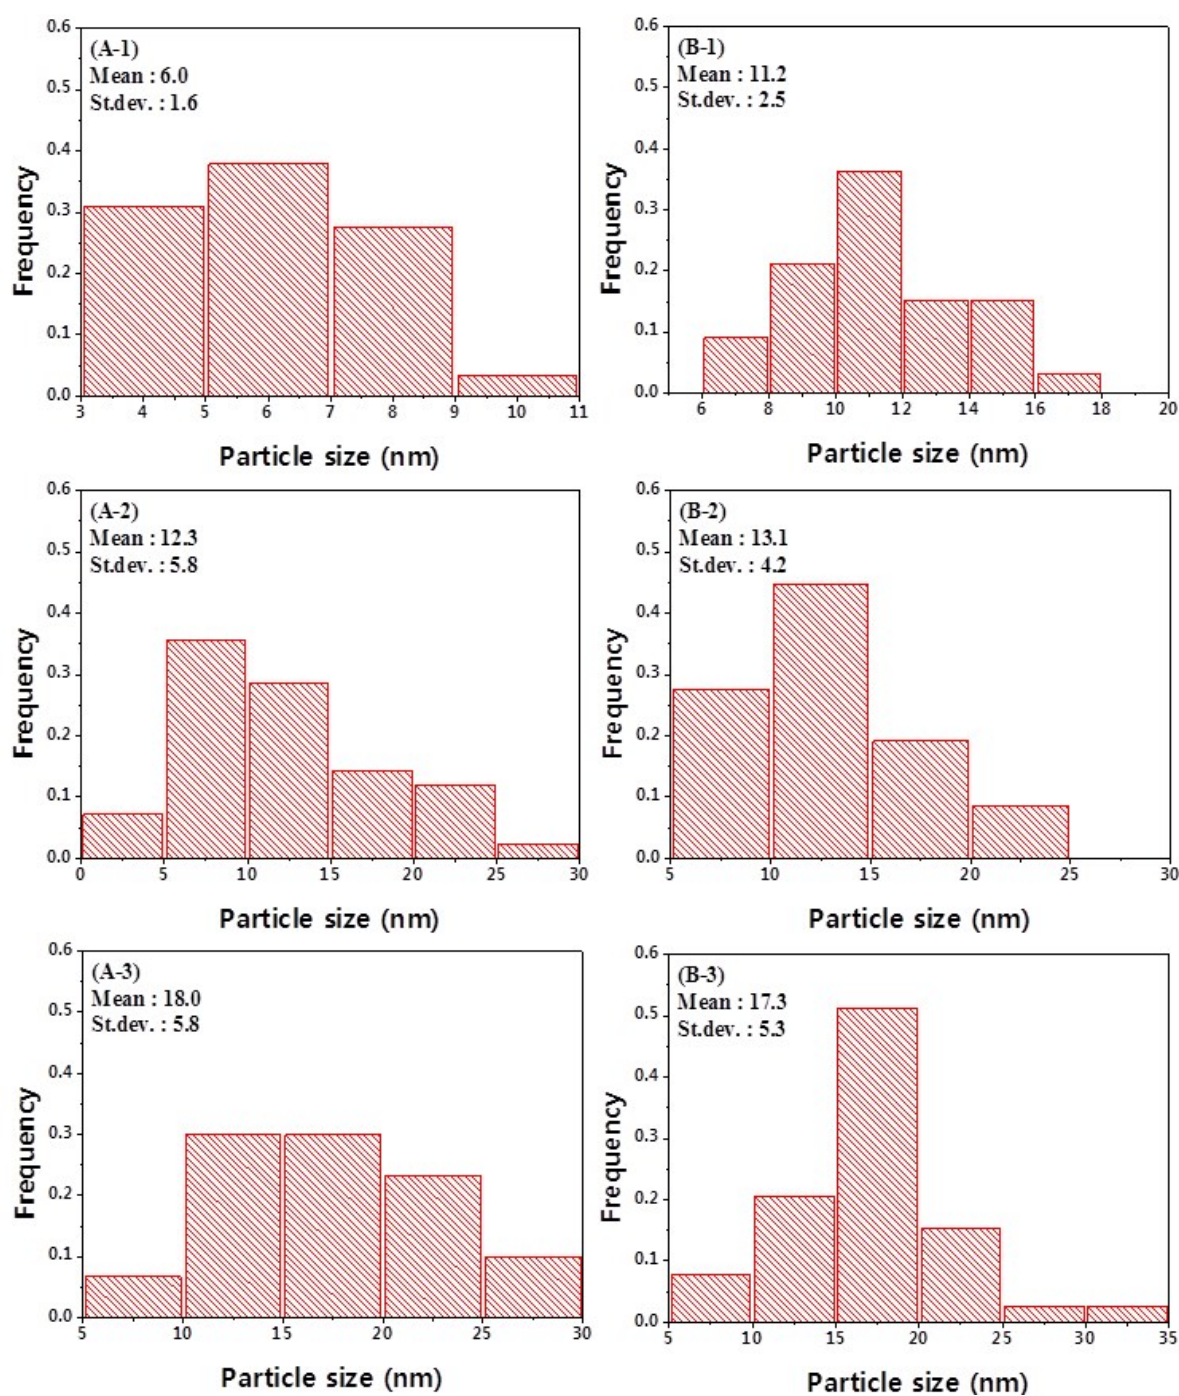

**Figure S8.** Cobalt particle size distributions from the TEM images of (A) Co/ $\gamma$ -Al<sub>2</sub>O<sub>3</sub>, (B) Co/SiO<sub>2</sub>: (1) reduced catalyst, (2) used catalyst without CO<sub>2</sub> addition and (3) used catalyst with CO<sub>2</sub> addition
